# Supplementary material for: Asymmetric dearomatization catalysed by chiral Brønsted acids via activation of ynamides
Source: Springer Nature journal article supplement (doi:10.1038/s41557-021-00778-z), 2021-10-11
Supplement: 41557_2021_778_MOESM161_ESM.mol [file 41557_2021_778_MOESM161_ESM.mol]

nchem.21020311B-comp2c.mol
  ChemDraw07202115532D

 36 41  0  0  1  0  0  0  0  0999 V2000
   -3.3331   -0.6691    0.0000 C   0  0  0  0  0  0  0  0  0  0  0  0
   -3.3331   -1.4965    0.0000 C   0  0  0  0  0  0  0  0  0  0  0  0
   -2.6168   -1.9101    0.0000 C   0  0  0  0  0  0  0  0  0  0  0  0
   -1.8998   -1.4965    0.0000 C   0  0  0  0  0  0  0  0  0  0  0  0
   -1.8998   -0.6691    0.0000 C   0  0  0  0  0  0  0  0  0  0  0  0
   -2.6168   -0.2555    0.0000 C   0  0  0  0  0  0  0  0  0  0  0  0
   -1.1835   -1.9101    0.0000 C   0  0  0  0  0  0  0  0  0  0  0  0
   -0.4673   -1.4965    0.0000 C   0  0  0  0  0  0  0  0  0  0  0  0
   -0.4673   -0.6691    0.0000 C   0  0  0  0  0  0  0  0  0  0  0  0
   -1.1835   -0.2555    0.0000 C   0  0  0  0  0  0  0  0  0  0  0  0
   -1.1835   -2.7344    0.0000 O   0  0  0  0  0  0  0  0  0  0  0  0
   -0.5140    0.2317    0.0000 C   0  0  0  0  0  0  0  0  0  0  0  0
   -0.7699    1.0177    0.0000 C   0  0  0  0  0  0  0  0  0  0  0  0
   -1.5972    1.0177    0.0000 C   0  0  0  0  0  0  0  0  0  0  0  0
   -1.8531    0.2317    0.0000 C   0  0  0  0  0  0  0  0  0  0  0  0
   -2.1511    1.6336    0.0000 C   0  0  0  0  0  0  0  0  0  0  0  0
   -2.9600    1.4612    0.0000 C   0  0  0  0  0  0  0  0  0  0  0  0
   -3.2159    0.6745    0.0000 C   0  0  0  0  0  0  0  0  0  0  0  0
   -2.6620    0.0594    0.0000 C   0  0  0  0  0  0  0  0  0  0  0  0
    0.2696   -0.0234    0.0000 N   0  0  0  0  0  0  0  0  0  0  0  0
    1.4953    1.0797    0.0000 C   0  0  0  0  0  0  0  0  0  0  0  0
    2.2790    0.8247    0.0000 C   0  0  0  0  0  0  0  0  0  0  0  0
    2.8918    1.3770    0.0000 C   0  0  0  0  0  0  0  0  0  0  0  0
    2.7202    2.1829    0.0000 C   0  0  0  0  0  0  0  0  0  0  0  0
    1.9366    2.4379    0.0000 C   0  0  0  0  0  0  0  0  0  0  0  0
    1.3237    1.8864    0.0000 C   0  0  0  0  0  0  0  0  0  0  0  0
    3.3331    2.7344    0.0000 Br  0  0  0  0  0  0  0  0  0  0  0  0
    0.8825    0.5282    0.0000 S   0  0  0  0  0  0  0  0  0  0  0  0
    0.3309    1.1410    0.0000 O   0  0  0  0  0  0  0  0  0  0  0  0
    1.4340   -0.0846    0.0000 O   0  0  0  0  0  0  0  0  0  0  0  0
    0.4412   -0.8300    0.0000 C   0  0  0  0  0  0  0  0  0  0  0  0
   -0.1716   -1.3816    0.0000 C   0  0  0  0  0  0  0  0  0  0  0  0
    0.0000   -2.1882    0.0000 C   0  0  0  0  0  0  0  0  0  0  0  0
    0.7837   -2.4425    0.0000 C   0  0  0  0  0  0  0  0  0  0  0  0
    1.3965   -1.8910    0.0000 C   0  0  0  0  0  0  0  0  0  0  0  0
    1.2249   -1.0851    0.0000 C   0  0  0  0  0  0  0  0  0  0  0  0
 21 22  2  0      
 22 23  1  0      
 23 24  2  0      
 24 25  1  0      
 25 26  2  0      
 21 26  1  0      
 24 27  1  0      
 21 28  1  0      
 28 29  2  0      
 28 30  2  0      
 20 28  1  0      
 31 32  2  0      
 32 33  1  0      
 33 34  2  0      
 34 35  1  0      
 35 36  2  0      
 31 36  1  0      
 20 31  1  0      
  1  2  2  0      
  2  3  1  0      
  3  4  2  0      
  4  5  1  0      
  5  6  2  0      
  6  1  1  0      
  4  7  1  0      
  7  8  1  0      
  8  9  2  0      
  9 10  1  0      
 10  5  1  0      
  7 11  2  0      
 10 12  1  6      
 12 13  2  0      
 13 14  1  0      
 14 15  2  0      
 10 15  1  1      
 14 16  1  0      
 16 17  2  0      
 17 18  1  0      
 18 19  2  0      
 19 15  1  0      
 12 20  1  0      
M  STY  1   1 SUP
M  SLB  1   1   1
M  SAL   1 10  21  22  23  24  25  26  27  28  29  30
M  SBL   1  1  11
M  SMT   1 Bs
M  SBV   1  11   -0.6128   -0.5516
M  STY  1   2 SUP
M  SLB  1   2   2
M  SAL   2  6  31  32  33  34  35  36
M  SBL   2  1  18
M  SMT   2 Ph
M  SBV   2  18   -0.1716    0.8066
M  END
