# Supplementary material for: Asymmetric dearomatization catalysed by chiral Brønsted acids via activation of ynamides
Source: Springer Nature journal article supplement (doi:10.1038/s41557-021-00778-z), 2021-10-11
Supplement: 41557_2021_778_MOESM367_ESM.mol [file 41557_2021_778_MOESM367_ESM.mol]

nchem.21020311B-comp8.mol
  ChemDraw07202115542D

 22 24  0  0  1  0  0  0  0  0999 V2000
   -0.4333    1.6079    0.0000 C   0  0  0  0  0  0  0  0  0  0  0  0
   -1.2608    1.6079    0.0000 C   0  0  0  0  0  0  0  0  0  0  0  0
   -1.5167    0.8210    0.0000 C   0  0  0  0  0  0  0  0  0  0  0  0
   -0.1774    0.8210    0.0000 N   0  0  0  0  0  0  0  0  0  0  0  0
   -0.4333   -0.9390    0.0000 N   0  0  0  0  0  0  0  0  0  0  0  0
   -1.2608   -0.9390    0.0000 C   0  0  0  0  0  0  0  0  0  0  0  0
   -1.5144   -0.1498    0.0000 C   0  0  0  0  0  0  0  0  0  0  0  0
   -0.8470    0.3345    0.0000 C   0  0  0  0  0  0  0  0  0  0  0  0
   -0.1774   -0.1513    0.0000 C   0  0  0  0  0  0  0  0  0  0  0  0
   -2.3006    0.5666    0.0000 C   0  0  0  0  0  0  0  0  0  0  0  0
    0.6501   -0.1513    0.0000 C   0  0  0  0  0  0  0  0  0  0  0  0
    0.0517    2.2753    0.0000 C   0  0  0  0  0  0  0  0  0  0  0  0
    0.5375   -2.2753    0.0000 C   0  0  0  0  0  0  0  0  0  0  0  0
    0.0533   -1.6079    0.0000 S   0  0  0  0  0  0  0  0  0  0  0  0
    0.7206   -1.1229    0.0000 O   0  0  0  0  0  0  0  0  0  0  0  0
   -0.6141   -2.0929    0.0000 O   0  0  0  0  0  0  0  0  0  0  0  0
    1.0639    0.5651    0.0000 C   0  0  0  0  0  0  0  0  0  0  0  0
    1.8883    0.5651    0.0000 C   0  0  0  0  0  0  0  0  0  0  0  0
    2.3006    1.2792    0.0000 C   0  0  0  0  0  0  0  0  0  0  0  0
    1.8883    1.9933    0.0000 C   0  0  0  0  0  0  0  0  0  0  0  0
    1.0639    1.9933    0.0000 C   0  0  0  0  0  0  0  0  0  0  0  0
    0.6517    1.2792    0.0000 C   0  0  0  0  0  0  0  0  0  0  0  0
 14 15  2  0      
 14 16  2  0      
 13 14  1  0      
  5 14  1  0      
 21 22  2  0      
 20 21  1  0      
 19 20  2  0      
 18 19  1  0      
 17 18  2  0      
 17 22  1  0      
 11 17  1  0      
  1  2  1  0      
  2  3  2  0      
  8  3  1  1      
  8  4  1  6      
  4  1  1  0      
  5  6  1  0      
  6  7  1  0      
  7  8  1  0      
  8  9  1  0      
  9  5  1  0      
  3 10  1  0      
  9 11  2  0      
  1 12  1  1      
M  STY  1   1 SUP
M  SLB  1   1   1
M  SAL   1  4  13  14  15  16
M  SBL   1  1   4
M  SMT   1 Ms
M  SBV   1   4   -0.4865    0.6689
M  STY  1   2 SUP
M  SLB  1   2   2
M  SAL   2  6  17  18  19  20  21  22
M  SBL   2  1  11
M  SMT   2 Ph
M  SBV   2  11   -0.4138   -0.7164
M  END
